# Supplementary material
Source: Springer Nature journal article supplement (https://www.springermedizin.de/resource/supplementary/12885_2013_4170_MOESM1_ESM.pdf/9465642)
Supplement: MOESM1 [file 9465642]

| <b>Gene Symbol</b> | <b>Chromosomal Location</b> | <b>log2(FoldChange)</b> |
|--------------------|-----------------------------|-------------------------|
| RBM20              | chr10q25.2                  | 2.20                    |
| UBE3A              | chr15q11.2                  | 2.12                    |
| ATRNL1             | chr10q26                    | 2.02                    |
| NCRNA00161         | chr21q21.3                  | 1.87                    |
| ABCB5              | chr7p21.1                   | 1.85                    |
| MGP                | chr12p12.3                  | 1.71                    |
| P2RX3              | chr11q12                    | 1.67                    |
| CORO2B             | chr15q23                    | 1.63                    |
| CCDC83             | chr11q14.1-q14.2            | 1.57                    |
| DENND2A            | chr7q34                     | 1.55                    |
| MYT1L              | chr2p25.3                   | 1.53                    |
| IGF1               | chr12q23.2                  | 1.50                    |
| EPHA5              | chr4q13.1                   | 1.33                    |
| LEPREL1            | chr3q28                     | 1.30                    |
| GPR156             | chr3q13.33                  | 1.30                    |
| AKT3               | chr1q43-q44                 | 1.29                    |
| DKK3               | chr11p15.2                  | 1.25                    |
| CYP2A6             | chr19q13.2                  | 1.19                    |
| DSCAM              | chr21q22.2                  | 1.16                    |
| IGFBP7             | chr4q12                     | 1.10                    |
| RGS8 / SDHAP3      | chr1q25 / chr5p15.33        | 1.08                    |
| ABCA9              | chr17q24.2                  | 1.06                    |
| SPON2              | chr4p16.3                   | 1.06                    |
| ZNF518B            | chr4p16.1                   | 1.05                    |
| SLC24A5            | chr15q21.1                  | 1.05                    |
| ZFP36              | chr19q13.1                  | 1.03                    |
| PML                | chr15q22                    | 1.00                    |
| FAM126A            | chr7p15.3                   | 0.98                    |
| SERPINB3           | chr18q21.3                  | 0.96                    |
| ANTXR2             | chr4q21.21                  | 0.95                    |
| TMEM204            | chr16p13.3                  | 0.94                    |
| PGCP               | chr8q22.2                   | 0.93                    |
| GTF2H2B            | chr5q13.2                   | 0.89                    |
| STX2               | chr12q24.33                 | 0.89                    |
| CD59               | chr11p13                    | 0.82                    |
| SPTBN4             | chr19q13.13                 | 0.82                    |
| SNX3               | chr6q21                     | 0.81                    |
| CAT                | chr11p13                    | 0.81                    |
| MIR770             | chr14q32.2                  | 0.79                    |
| INSR               | chr19p13.3-p13.2            | 0.75                    |
| VKORC1             | chr16p11.2                  | 0.75                    |

|              |                        |       |
|--------------|------------------------|-------|
| IGHV3OR16-14 | chr16p11.2             | 0.72  |
| EIF3F        | chr11p15.4             | 0.70  |
| IL6ST        | chr5q11                | 0.67  |
| MOSPD1       | chrXq26.3              | 0.64  |
| RNF133       | chr7q31.32             | 0.64  |
| IPO11        | chr5q12.1              | 0.60  |
| SUMF2        | chr7q11.1              | 0.60  |
| WRB          | chr21q22.3             | 0.60  |
| TMEM106B     | chr7p21.3              | 0.59  |
| PPM1F        | chr22q11.22            | 0.58  |
| MMGT1        | chrXq26.3              | 0.58  |
| PCNX         | chr14q24.2             | 0.57  |
| RNH1         | chr11p15.5             | 0.56  |
| MICAL3       | chr22q11.21            | 0.56  |
| TPP1         | chr11p15               | 0.55  |
| RBMX         | chrXq26.3              | 0.54  |
| BTF3         | chr5q13.2              | 0.54  |
| GNA12        | chr7p22.2              | 0.54  |
| ZXDA / ZXDB  | chrXp11.1 / chrXp11.21 | 0.53  |
| METTL9       | chr16p13-p12           | 0.53  |
| CD81         | chr11p15.5             | 0.52  |
| TTC3         | chr21q22.2             | 0.49  |
| RPL10A       | chr6p21.31             | 0.49  |
| TAF9         | chr5q11.2-q13.1        | 0.48  |
| TSG101       | chr11p15               | 0.47  |
| SLC9A6       | chrXq26.3              | 0.46  |
| DNASE1L1     | chrXq28                | 0.44  |
| POFUT2       | chr21q22.3             | 0.41  |
| RPL23        | chr17q                 | 0.41  |
| EIF1         | chr17q21.2             | 0.39  |
| L1CAM        | chrXq28                | 0.39  |
| RPS3A        | chr4q31.2-q31.3        | 0.35  |
| RPS15A       | chr16p                 | 0.25  |
| PSMG2        | chr18p11.21            | -0.28 |
| RAB35        | chr12q24.31            | -0.31 |
| RNF10        | chr12q24.31            | -0.33 |
| STARD7       | chr2q11.2              | -0.35 |
| HMGXB3       | chr5q32                | -0.35 |
| SNRNP200     | chr2q11.2              | -0.36 |
| SP3          | chr2q31                | -0.36 |
| ZNF131       | chr5p12                | -0.40 |
| PHIP         | chr6q14                | -0.40 |
| CRIP1        | chr2p21                | -0.41 |

|          |               |       |
|----------|---------------|-------|
| YIPF1    | chr1p33-p32.1 | -0.43 |
| DDX5     | chr17q21      | -0.44 |
| KIAA1731 | chr11q21      | -0.45 |
| RTN3     | chr11q13      | -0.45 |
| TRIT1    | chr1p34.2     | -0.46 |
| KIAA0467 | chr1p34.2     | -0.49 |
| NASP     | chr1p34.1     | -0.49 |
| RPS19    | chr19q13.2    | -0.49 |
| RPS6KB2  | chr11q13.2    | -0.50 |
| AFG3L2   | chr18p11      | -0.51 |
| RREB1    | chr6p25       | -0.51 |
| GMPS     | chr3q24       | -0.51 |
| CEP192   | chr18p11.21   | -0.52 |
| TESK1    | chr9p13       | -0.52 |
| CHMP1B   | chr18p11.21   | -0.53 |
| RIF1     | chr2q23.3     | -0.54 |
| ATAD2    | chr8q24.13    | -0.54 |
| NSFL1C   | chr20p13      | -0.55 |
| NDUFS1   | chr2q33-q34   | -0.55 |
| PTPN6    | chr12p13      | -0.56 |
| ORC2     | chr2q33       | -0.57 |
| RBM26    | chr13q31.1    | -0.57 |
| POLA2    | chr11q13.1    | -0.58 |
| POLE     | chr12q24.3    | -0.59 |
| SASS6    | chr1p21.2     | -0.59 |
| RSF1     | chr11q14.1    | -0.59 |
| FANCB    | chrXp22.2     | -0.59 |
| DTX3L    | chr3q21.1     | -0.59 |
| MRPS15   | chr1p34.3     | -0.60 |
| IDH3B    | chr20p13      | -0.60 |
| ARHGEF7  | chr13q34      | -0.61 |
| DIS3L2   | chr2q37.1     | -0.61 |
| FASTKD1  | chr2q31       | -0.62 |
| RNF138   | chr18q12.1    | -0.62 |
| RALBP1   | chr18p11.3    | -0.63 |
| PPARGC1B | chr5q32       | -0.63 |
| USP37    | chr2q35       | -0.63 |
| HINT1    | chr5q31.2     | -0.64 |
| USP28    | chr11q23      | -0.64 |
| TRMT6    | chr20p12.3    | -0.65 |
| PRPF38B  | chr1p13.3     | -0.65 |
| March7th | chr2q24.2     | -0.65 |
| ZBED6    | chr1q32.1     | -0.65 |

|                                   |                                   |       |
|-----------------------------------|-----------------------------------|-------|
| FAM111A                           | chr11q12.1                        | -0.65 |
| USP15                             | chr12q14                          | -0.66 |
| NAA15                             | chr4q31.1                         | -0.66 |
| DCAF7                             | chr17q23.3                        | -0.67 |
| ZCCHC3                            | chr20p13-p12.2                    | -0.68 |
| PPP1R3E                           | chr14q11.2                        | -0.69 |
| MTF2                              | chr1p22.1                         | -0.70 |
| IL20RB                            | chr3q22.3                         | -0.70 |
| NR2C2                             | chr3p25                           | -0.70 |
| FAM72A / FAM72B / FAM72C / FAM72D | chr1p11.2 / chr1q21.1 / chr1q32.1 | -0.72 |
| THRB                              | chr3p24.2                         | -0.72 |
| STK35                             | chr20p13                          | -0.72 |
| TTF2                              | chr1p22                           | -0.73 |
| POLQ                              | chr3q13.33                        | -0.73 |
| BRIP1                             | chr17q22.2                        | -0.74 |
| MAVS                              | chr20p13                          | -0.75 |
| CDCA2                             | chr8p21.2                         | -0.76 |
| GTF3C3                            | chr2q33.1                         | -0.76 |
| RABEPK                            | chr9q33.3                         | -0.77 |
| PSMF1                             | chr20p13                          | -0.78 |
| GK5                               | chr3q23                           | -0.79 |
| NUP160                            | chr11p11.2                        | -0.79 |
| SNORD104                          | chr17q23.3                        | -0.79 |
| RBCK1                             | chr20p13                          | -0.79 |
| TRAF3IP3                          | chr1q32.3-q41                     | -0.79 |
| TMEM19                            | chr12q21.1                        | -0.79 |
| KRTAP7-1                          | chr21q22.1                        | -0.79 |
| MCM10                             | chr10p13                          | -0.80 |
| PARP9                             | chr3q21                           | -0.82 |
| NUF2                              | chr1q23.3                         | -0.83 |
| DNA2                              | chr10q21.3-q22.1                  | -0.84 |
| GIPC1                             | chr19p13.1                        | -0.86 |
| ITSN1                             | chr21q22.1-q22.2                  | -0.86 |
| CDC7                              | chr1p22                           | -0.86 |
| MYO9B                             | chr19p13.1                        | -0.87 |
| CYP27B1                           | chr12q13.1-q13.3                  | -0.88 |
| ZNF655                            | chr7q22.1                         | -0.88 |
| H2AFY                             | chr5q31.3-q32                     | -0.90 |
| MYH8                              | chr17p13.1                        | -0.90 |
| HECTD1                            | chr14q12                          | -0.90 |
| OAF                               | chr11q23.3                        | -0.91 |
| SLFN13                            | chr17q12                          | -0.92 |
| ANKS6                             | chr9q22.33                        | -0.92 |

|                      |                     |       |
|----------------------|---------------------|-------|
| TRIM62               | chr1p35.1           | -0.92 |
| DLEU2                | chr13q14.3          | -0.93 |
| OVOL2                | chr20pter-q11.23    | -0.94 |
| SP100                | chr2q37.1           | -0.96 |
| SREBF1               | chr17p11.2          | -0.99 |
| MCM8                 | chr20p12.3          | -0.99 |
| INTS6                | chr13q14.3          | -1.00 |
| GALK1                | chr17q24            | -1.00 |
| ZNF83                | chr19q13.3          | -1.03 |
| SH3D20               | chr17q21.31         | -1.04 |
| MRPL20               | chr1p36.3-p36.2     | -1.05 |
| MAP4K2               | chr11q13            | -1.06 |
| RAB3IP               | chr12q14.3          | -1.07 |
| RTKN2                | chr10q21.2          | -1.09 |
| SNX5                 | chr20p11            | -1.12 |
| SMEK2                | chr2p16.1           | -1.12 |
| HIST1H2AD / HIST1H3D | chr6p21.3           | -1.13 |
| IZUMO2               | chr19q13.33         | -1.15 |
| LRRFIP1              | chr2q37.3           | -1.16 |
| KRAS                 | chr12p12.1          | -1.16 |
| OAS3                 | chr12q24.2          | -1.18 |
| LMO1                 | chr11p15            | -1.21 |
| KIF24                | chr9p13.3           | -1.24 |
| UNC45B               | chr17q12            | -1.27 |
| TIAM1                | chr21q22.1 21q22.11 | -1.41 |
| CSTL1                | chr20p11.21         | -1.42 |
| IL2RA                | chr10p15-p14        | -1.43 |
| RNF165               | chr18q21.1          | -1.46 |
| C8B                  | chr1p32             | -1.48 |
| NDST4                | chr4q26             | -1.52 |
| SLC22A1              | chr6q26             | -1.61 |
| PCDH7                | chr4p15             | -1.65 |
| USP2                 | chr11q23.3          | -1.89 |
| HIST1H3G             | chr6p21.3           | -2.72 |
